# Supplementary material for: Connected partner-switches control the life style of Pseudomonas aeruginosa through RpoS regulation
Source: PubMed Central journal article supplement (PMC6482189; doi:10.1038/s41598-019-42653-5), 2019-04-24

1 Supplementary Information for

2  
3 **Connected partner-switches control the life style of *Pseudomonas***  
4 ***aeruginosa* through RpoS regulation**

5  
6  
7  
8 Sophie Bouillet<sup>a</sup>, Moly Ba<sup>b</sup>, Laetitia Houot<sup>b</sup>, Chantal Iobbi-Nivol<sup>a1</sup> and  
9 Christophe Bordi<sup>b1</sup>

10  
11  
12  
13  
14 <sup>a</sup> Aix Marseille Univ, CNRS, BIP, Marseille, France

15 <sup>b</sup> Aix Marseille Univ, CNRS, LISM, Marseille, France

16  
17  
18  
19  
20  
21  
22  
23 <sup>1</sup>To whom correspondence should be addressed; e-mail: bordi@imm.cnrs.fr,  
24 iobbi@imm.cnrs.fr

25  
26  
27  
28  
29 **This PDF file includes:**

30 Figs. S1 to S6

31 Tables S1 and S2

32 Supplementary references

33  
34

35

36 **Fig. S1 Domain organization of CrsR and HsbR response regulators.**

37 Schematic representation of the three domains of CrsR and HsbR. CrsR contains 565 amino  
38 acids and HsbR 571. The N-terminal regulatory receiver domain (D1, residues 1–118 and 13–  
39 125 for CrsR and HsbR, respectively), the central PP2C phosphatase domain (D2, residues 193–  
40 391 and 188–336 for CrsR and HsbR, respectively), and the C-terminal GHKL (gyrase, Hsp90,  
41 histidine kinase, MutL) ATPase and anti-sigma factor domain (D3, residues 407–565 and 445–  
42 563 for CrsR and HsbR, respectively) are shown. The level of identity between homologous  
43 domains (in %) is indicated. Domains were defined using Pfam database.

44

45 **Fig S2. Control of *in vivo* interaction by a two-hybrid assay.**

46 Each fusion protein in both T18 and T25 vectors were tested against the empty counterpart  
47 vector. Positive (T18zip/T25zip) and negative (empty vectors) controls were added.  
48 Galactosidase activities are expressed in miller units. The data from three replicates are  
49 presented as means S.D.

50

51 **Fig S3. Statistical analysis of *PrsmY-lacZ* transcriptional fusion in various *P. aeruginosa***  
52 **strains.** Activity was recorded after 6 and 8 hours of growth. Corresponding  $\beta$ -galactosidase  
53 activities are expressed in Miller units and correspond to mean values (with error bars) obtained  
54 from three independent experiments. Wilcoxon-Mann-Whitney tests were performed, and \*, \*\*  
55 and \*\*\* referred to  $p < 0.05$ ,  $p < 0.01$  and  $p < 0.001$ , respectively.

56

57 **Fig S4. Growth curves of the *P. aeruginosa* strains used to study *PrsmY-lacZ***  
58 **transcriptional expression.**

59 For each strain the OD<sub>600 nm</sub> value correspond to mean values (with error bars) obtained from  
60 three independent experiments

61

62 **Fig. S5 Expression of *PrsmY-lacZ* transcriptional fusion in PAK, PAK $\Delta$ *hptB*, PAK $\Delta$ *fliA***  
63 **or PAK $\Delta$ *hptBfliA* strains.** Activity was recorded after 4h growth. Corresponding  $\beta$ -  
64 galactosidase activities are expressed in Miller units and correspond to mean values (with error  
65 bars) obtained from three independent experiments. Wilcoxon-Mann-Whitney tests were  
66 performed, and ns referred to nonsignificant difference.

67

68 **Fig. S6 Biofilm formation in PAK and PAK $\Delta$ *rpoS* at different growth stages.** (A) Biofilm  
69 production monitored at different growth stages in glass tubes (upper panel) and quantified after  
70 Crystal Violet-staining (lower panel). Corresponding levels of biofilm production represent  
71 mean values and standard deviations obtained from six independent experiments. (B) Biofilm  
72 formation is monitored by confocal laser scanning microscopy at the time indicated in the  
73 figure. The extracted z images and their respective xy and xz planes are shown.

74

75

76 **Table S1: Strains and plasmids used in this study**

| Strains                                       | Relevant characteristics*                                                                                                                                         | Source         |
|-----------------------------------------------|-------------------------------------------------------------------------------------------------------------------------------------------------------------------|----------------|
| <b><i>E. coli</i></b>                         |                                                                                                                                                                   |                |
| DH5a                                          | <i>endA1 hsdR17 supE44 thi-1 recA1 gyrA relA1 Δ(lacZYA-argF)U169 deoR (phi 80lacZ Δ M15)</i>                                                                      | Lab collection |
| BA159                                         | BTH101 (F- <i>cya-99 araD139 galE15 galK16 rpsL1</i> (Sm <sup>R</sup> ) <i>hsdR2 mcrA1 mcrB1 clpXP::cat rpoS::tet</i> )                                           | (1)            |
| CC118(λpir)                                   | Host strain for pKNG101 replication, <i>Δ(ara-leu) araD ΔlacX74 galE galK phoA20 thi-1 rpsE rpoB argE(Am) recA1 Rf<sup>R</sup></i> (λpir)                         | Lab collection |
| <b><i>P. aeruginosa</i></b>                   |                                                                                                                                                                   |                |
| PAK                                           | Wild-type                                                                                                                                                         | (2)            |
| PAKΔ <i>htpB</i>                              | PAK deletion mutant for <i>htpB</i> gene                                                                                                                          | (3)            |
| PAKΔ <i>rpoS</i>                              | PAK deletion mutant for <i>rpoS</i> gene                                                                                                                          | This study     |
| PAKΔ <i>hsbD</i>                              | PAK deletion mutant for <i>hsbD</i> gene                                                                                                                          | This study     |
| PAKΔ <i>htpBΔrpoS</i>                         | PAK deletion mutant for <i>htpB</i> and <i>rpoS</i> genes                                                                                                         | This study     |
| PAKΔ <i>hsbDΔrpoS</i>                         | PAK deletion mutant for <i>hsbD</i> and <i>rpoS</i> genes                                                                                                         | This study     |
| PAKΔ <i>htpBΔhsbD</i>                         | PAK deletion mutant for <i>htpB</i> and <i>htpB</i> genes                                                                                                         | This study     |
| PAKΔ <i>htpBΔhsbDΔrpoS</i>                    | PAK deletion mutant for <i>htpB</i> , <i>hsbD</i> and <i>rpoS</i> genes                                                                                           | This study     |
| PAKΔ <i>hsbA</i>                              | PAK deletion mutant for <i>hsbA</i> gene                                                                                                                          | (3)            |
| PAKΔ <i>fliA</i>                              | PAK deletion mutant for <i>fliA</i> gene                                                                                                                          | This study     |
| PAKΔ <i>htpBΔfliA</i>                         | PAK deletion mutant for <i>htpB</i> and <i>fliA</i> genes                                                                                                         | This study     |
| PAKattB:: <i>rsmY-lacZ</i>                    | PAK strain with <i>rsmY-lacZ</i> inserted at <i>attB</i> sites                                                                                                    | (4)            |
| PAKΔ <i>rpoS</i> attB:: <i>rsmY-lacZ</i>      | PAKΔ <i>rpoS</i> strain with <i>rsmY-lacZ</i> inserted at <i>attB</i> sites                                                                                       | This study     |
| PAKΔ <i>htpB</i> attB:: <i>rsmY-lacZ</i>      | PAKΔ <i>htpB</i> strain with <i>rsmY-lacZ</i> inserted at <i>attB</i> sites                                                                                       | This study     |
| PAKΔ <i>htpBΔrpoS</i> attB:: <i>rsmY-lacZ</i> | PAKΔ <i>htpBΔrpoS</i> strain with <i>rsmY-lacZ</i> inserted at <i>attB</i> sites                                                                                  | This study     |
| PAKΔ <i>gacA</i> attB:: <i>rsmY-lacZ</i>      | PAKΔ <i>gacA</i> strain with <i>rsmY-lacZ</i> inserted at <i>attB</i> sites                                                                                       | (4)            |
| <b>Plasmid</b>                                |                                                                                                                                                                   |                |
| pUT18C                                        | Two-hybrid plasmid, <i>cyaAT18</i> fusion, Ap <sup>R</sup>                                                                                                        | (5)            |
| pUT18C- <i>crsRD3</i>                         | Two-hybrid plasmid containing <i>cyaAT18-crsR</i> D3 domain fusion, Ap <sup>R</sup>                                                                               | (6)            |
| pUT18C- <i>hsbRD3</i>                         | Two-hybrid plasmid containing <i>cyaAT18- hsbR</i> D3 domain fusion, Ap <sup>R</sup>                                                                              | (3)            |
| pUT18C- <i>rpoSso</i>                         | Two-hybrid plasmid containing <i>cyaAT18- rpoS S. oneidensis</i> fusion, Ap <sup>R</sup>                                                                          | (6)            |
| pUT18C- <i>rpoSpa</i>                         | Two-hybrid plasmid containing <i>cyaAT18- rpoS P. aeruginosa</i> domain fusion, Ap <sup>R</sup>                                                                   | This study     |
| pKT25                                         | Two-hybrid plasmid, <i>cyaAT25</i> fusion, Km <sup>R</sup>                                                                                                        | (5)            |
| pKT25- <i>crsRD3</i>                          | Two-hybrid plasmid containing <i>cyaAT25- crsR</i> D3 domain fusion, Km <sup>R</sup>                                                                              | (6)            |
| pKT25- <i>hsbRD3</i>                          | Two-hybrid plasmid containing <i>cyaAT25- hsbR</i> D3 domain fusion, Km <sup>R</sup>                                                                              | (7)            |
| pKT25- <i>rpoSso</i>                          | Two-hybrid plasmid containing <i>cyaAT25- rpoS S. oneidensis</i> fusion, Km <sup>R</sup>                                                                          | This study     |
| pKT25- <i>rpoSpa</i>                          | Two-hybrid plasmid containing <i>cyaAT25- rpoS P. aeruginosa</i> fusion, Km <sup>R</sup>                                                                          | This study     |
| miniCTX- <i>lacZ</i>                          | Tc <sup>r</sup> <i>lacZ</i> <sup>+</sup> ; self-proficient integration vector with <i>tet</i> , V- <i>FRT-attPMCS</i> , <i>ori</i> , <i>int</i> , and <i>oriT</i> | (8)            |
| miniCTX- <i>rsmY-lacZ</i>                     | Promoter region of <i>rsmY</i> gene inserted into miniCTX- <i>lacZ</i> , Tc <sup>R</sup>                                                                          | (4)            |
| pBBRMCS5                                      | Broad host range plasmid, Gm <sup>R</sup>                                                                                                                         | (8)            |
| pBBR- <i>rpoS</i>                             | pBBRMCS5 carrying the <i>rpoS</i> gene, Gm <sup>K</sup>                                                                                                           | This study     |
| pBBRMCS4                                      | Broad host range plasmid, Ap <sup>R</sup>                                                                                                                         | (8)            |
| pBBR- <i>hsbA</i>                             | pBBRMCS4 carrying the <i>hsbA</i> gene, Ap <sup>R</sup>                                                                                                           | (3)            |
| pBBR- <i>hsbA</i> <sub>S56A</sub>             | pBBRMCS4 carrying the <i>hsbA</i> gene with <i>S56A</i> substitution, Ap <sup>R</sup>                                                                             | This study     |
| pBBR- <i>hsbA</i> <sub>S56D</sub>             | pBBRMCS4 carrying the <i>hsbA</i> gene with <i>S56D</i> substitution, Ap <sup>R</sup>                                                                             | This study     |
| pRK2013                                       | Tra <sup>+</sup> Mob <sup>+</sup> Km <sup>R</sup>                                                                                                                 | Lab collection |
| pKNG101Δ <i>rpoS</i>                          | Mutator plasmid for <i>rpoS</i> deletion Sm <sup>R</sup>                                                                                                          | This study     |
| pKNG101Δ <i>fliA</i>                          | Mutator plasmid for <i>fliA</i> deletion Sm <sup>R</sup>                                                                                                          | This study     |
| pJN105                                        | araC-pBAD expression vector, Gm <sup>R</sup>                                                                                                                      | Lab collection |
| pJN-RpoS                                      | pJN105 carrying the <i>rpoS</i> gene, Gm <sup>R</sup>                                                                                                             | This study     |

77 \* Sm<sup>R</sup>, streptomycin resistance, Gm<sup>R</sup> gentamicin resistance, Ap<sup>R</sup> ampicillin resistance, Km<sup>R</sup> kanamycin resistance and Tc<sup>R</sup> tetracycline  
78 resistance  
79

80 **Table S2: Oligonucleotides used in this study**

| Names                         | Oligonucleotides (5'→3')                         |
|-------------------------------|--------------------------------------------------|
| <b>Two-Hybrid</b>             |                                                  |
| DH_PAK UP_RpoS                | CCTCTAGAGATGGCACTCAAAAAAGAAGGG                   |
| DH_PAK Do_RpoS                | GGGGTACCTCACTGGAACAGCGCTCACTCG                   |
| DH SO UP_RpoS                 | TAGAATTCATGAGCCGCATAAATAGCACTG                   |
| DH SO DO_RpoS                 | TACTCGAGTTAATTTCTAAATAGAGCCTC                    |
| <b>Gene Deletion</b>          |                                                  |
| UpUFliA                       | CCGGATCCGCACCTCTCGCCGATGCAGC                     |
| UpDFliA                       | TGGCCGGAGCTGGCACGGCCGAACCTGTCGCGGG               |
| DnUFliA                       | AGGTTCCGGCCGTACCGCCTCGACCGCAGC                   |
| DnDFliA                       | GGACTAGTCACCGCCTGCTGGAAGTGCC                     |
| UpURpoS                       | CCCCCCCCTGCAGGTCGACGGATCCTACGTCGGTACCTGCCAAGC    |
| UpDRpoS                       | GGTCTAAGGTTTTCCGTCACCATGTCGTTATCCCTTGCATGAGTTCCG |
| DnURpoS                       | TGCAAGGGATAACGACATGGTGACGGAAAACCTTAGACCC         |
| DnDRpoS                       | TTCTACTTATGGTACCCGGGGATCCGAGAAGAAGGATGCCCTG      |
| UpUHsbD                       | CCCTGCAGGTCGACGGATGCGCTCGCTATCCGACATGG           |
| UpDHsbD                       | TGCGCCATGGACTCACACCTCTTCTTGGAGGGCTTGG            |
| DnUHsbD                       | CCAAGAGAAGAGGTGTGAGTCCATGGCCGATTTGTCC            |
| DnDHsbD                       | CTTATGGTACCCGGGGATCCGGTTCTCCAGGCGTAGCAGG         |
| <b>Quick change mutations</b> |                                                  |
| HsbA-S56A-QC-F                | ACTTACCTGGACGCGTCGGCCCTCGGC                      |
| HsbA-S56A-QC-R                | GCCGAGGGCCGACGCGTCCAGGTAAGT                      |
| HsbA-S56D-QC-F                | ACTTACCTGGACGATTCCGGCCCTCGGC                     |
| HsbA-S56D-QC-R                | GCCGAGGGCCGAATCGTCCAGGTAAGT                      |
| <b>Gene expression</b>        |                                                  |
| Up_RopS_prod                  | TTCTGCAGCCCGGGGATCTCCAGCGGAAAGGAATCGC            |
| Do_RpoS_prod                  | GCCGCTCTAGAACTAGTGGATCTGTAAGTTAATGCTTACAAGAGC    |

81

82

83  
84  
85  
86  
87  
88  
89  
90  
91  
92  
93  
94  
95  
96  
97  
98  
99  
100  
101  
102  
103  
104  
105  
106

## Supplementary references

1. Battesti A, Bouveret E (2012) The bacterial two-hybrid system based on adenylate cyclase reconstitution in *Escherichia coli*. *Methods* 58(4):325–34.
2. Sastry PA, Pearlstone JR, Smillie LB, Paranchych W (1983) Amino acid sequence of pilin isolated from *Pseudomonas aeruginosa* PAK. *FEBS Lett* 151(2):253–6.
3. Bordi C, et al. (2010) Regulatory RNAs and the HptB/RetS signalling pathways fine-tune *Pseudomonas aeruginosa* pathogenesis. *Mol Microbiol* 76(6):1427–1443.
4. Chambonnier G, et al. (2016) The Hybrid Histidine Kinase LadS Forms a Multicomponent Signal Transduction System with the GacS/GacA Two-Component System in *Pseudomonas aeruginosa*. *PLOS Genet* 12(5):e1006032.
5. Karimova G, Ullmann A, Ladant D (2000) A bacterial two-hybrid system that exploits a cAMP signaling cascade in *Escherichia coli*. *Methods Enzymol* 328:59–73.
6. Bouillet S, et al. (2016) The General Stress Response  $\sigma$ S Is Regulated by a Partner Switch in the Gram-negative Bacterium *Shewanella oneidensis*. *J Biol Chem* 291(50):26151–26163.
7. Houot L, Fanni A, de Bentzmann S, Bordi C (2012) A bacterial two-hybrid genome fragment library for deciphering regulatory networks of the opportunistic pathogen *Pseudomonas aeruginosa*. *Microbiology* 158(Pt\_8):1964–1971.
8. Hoang TT, Kutchma AJ, Becher A, Schweizer HP (2000) Integration-proficient plasmids for *Pseudomonas aeruginosa*: site-specific integration and use for engineering of reporter and expression strains. *Plasmid* 43(1):59–72.

Figure S1

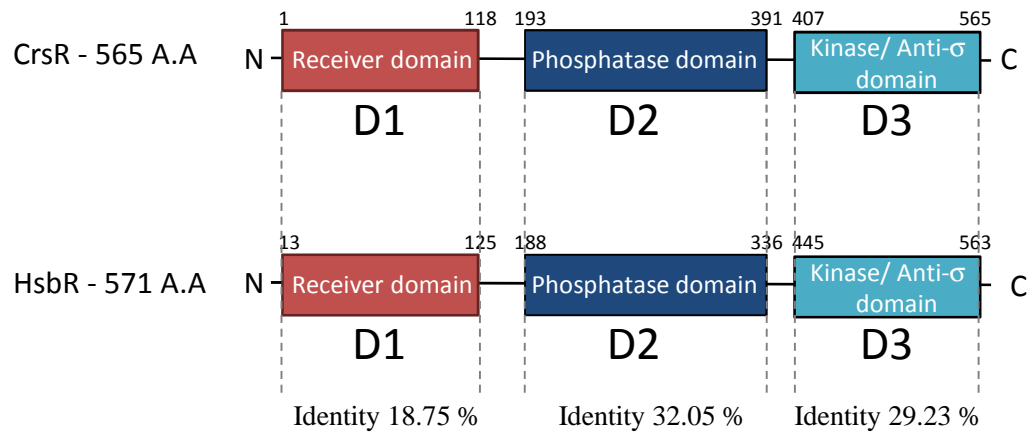

Figure S2

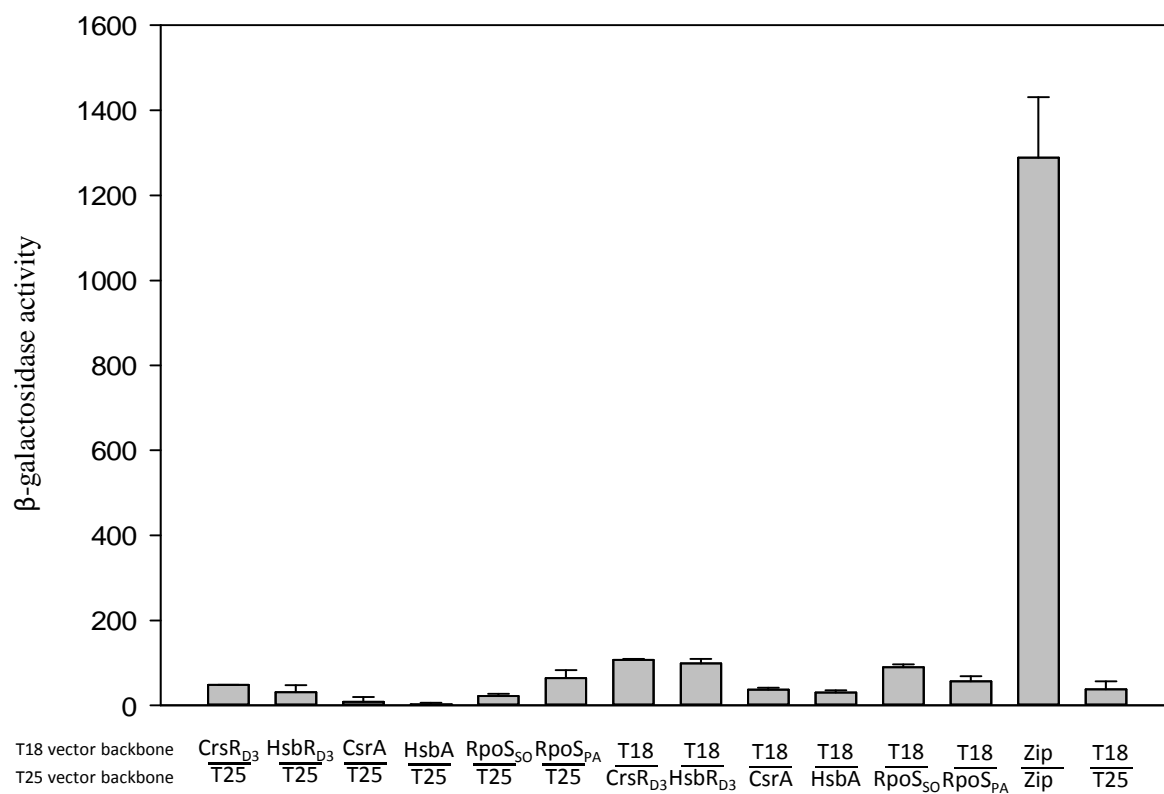



Figure S3

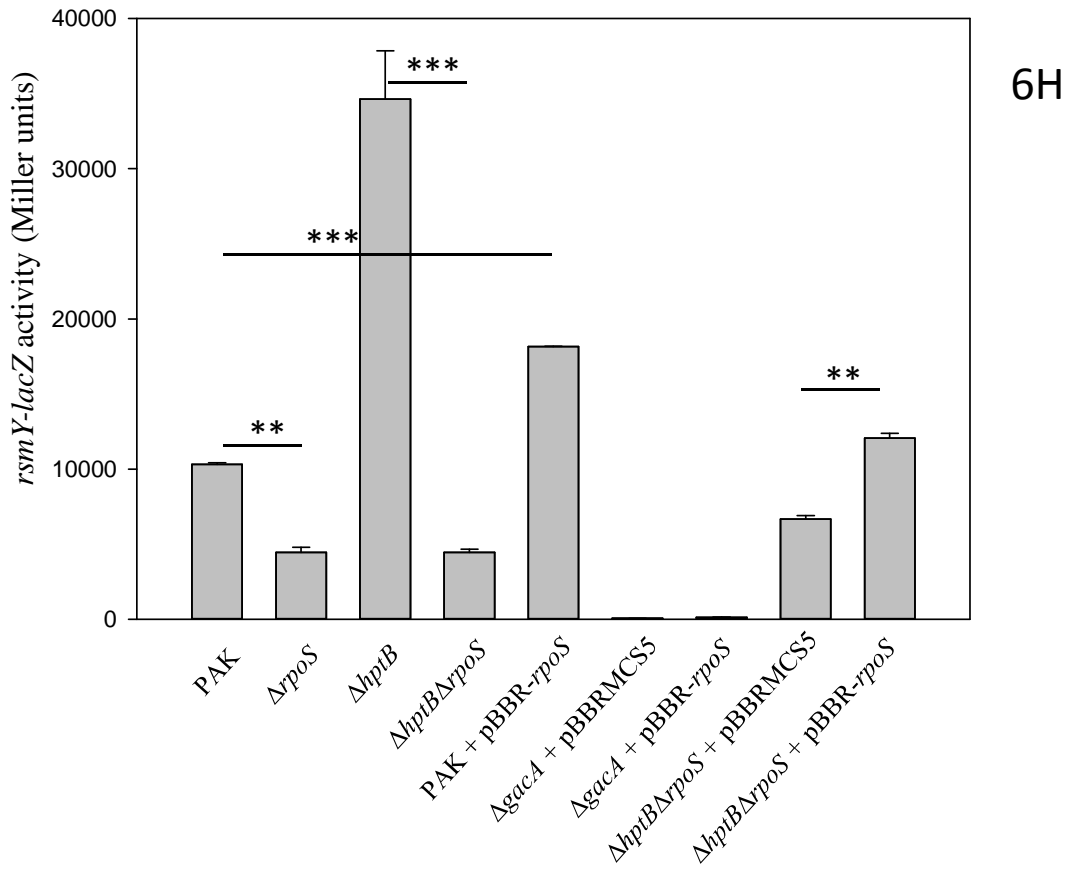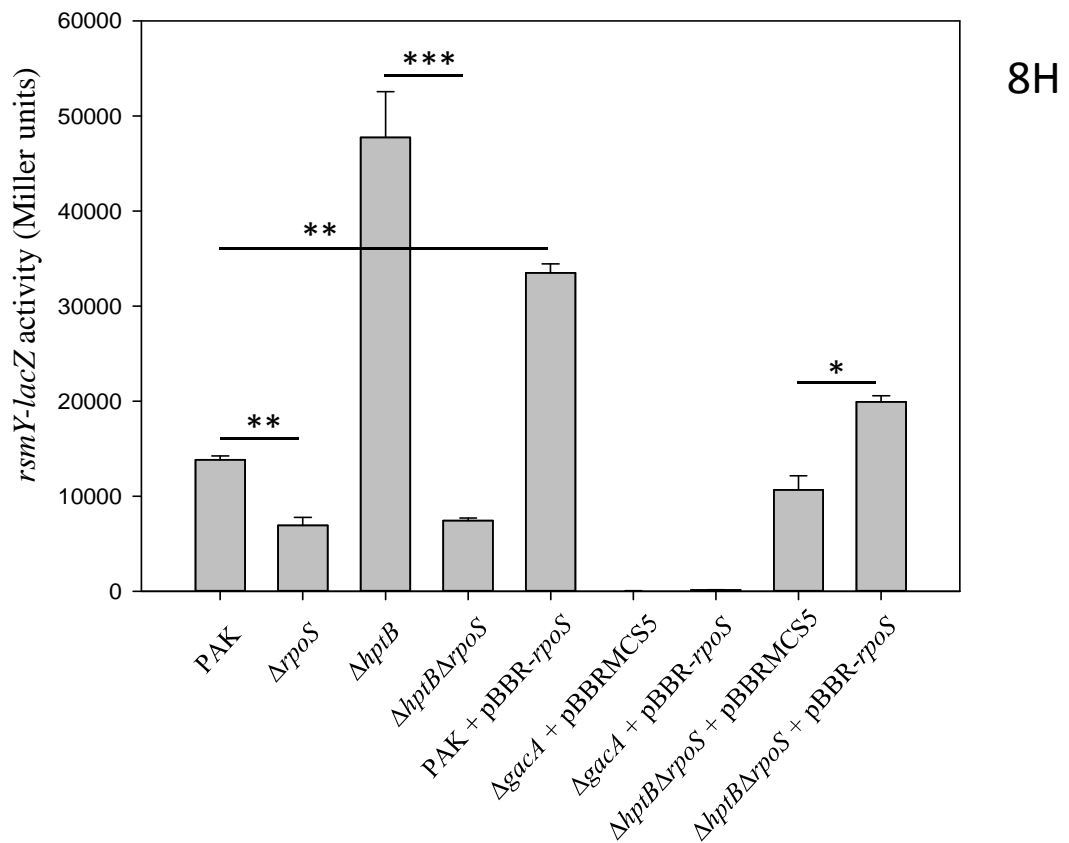

Figure S4

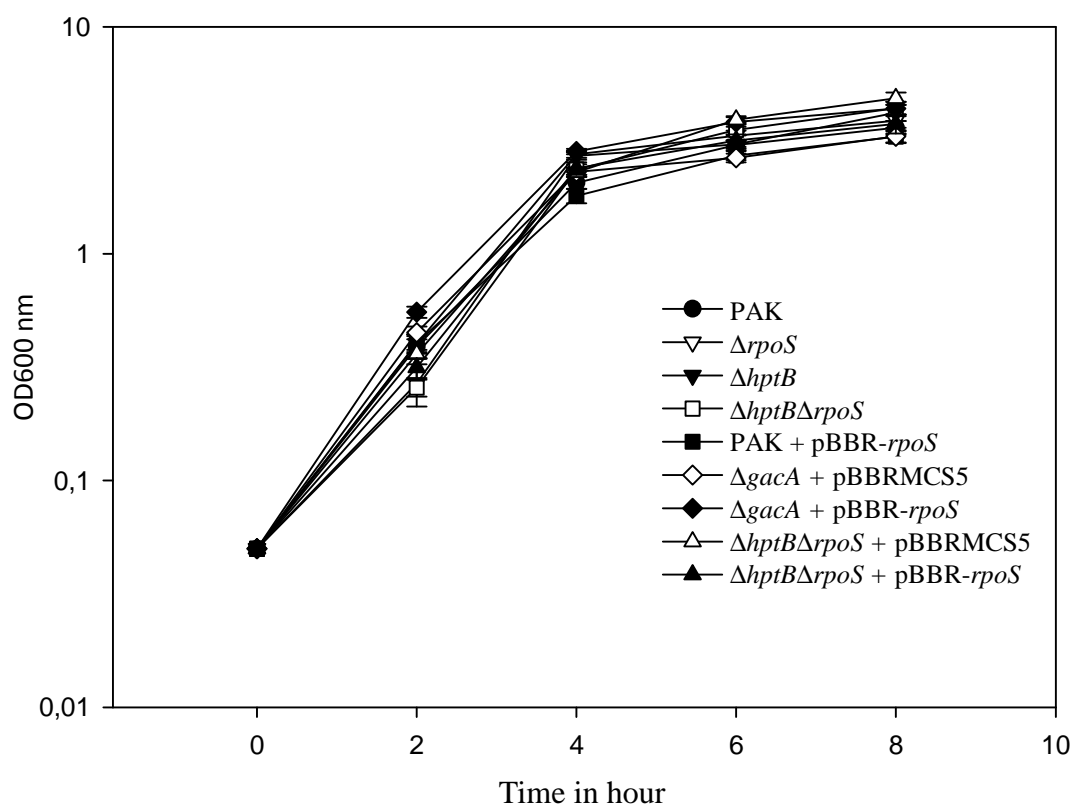

Figure S5

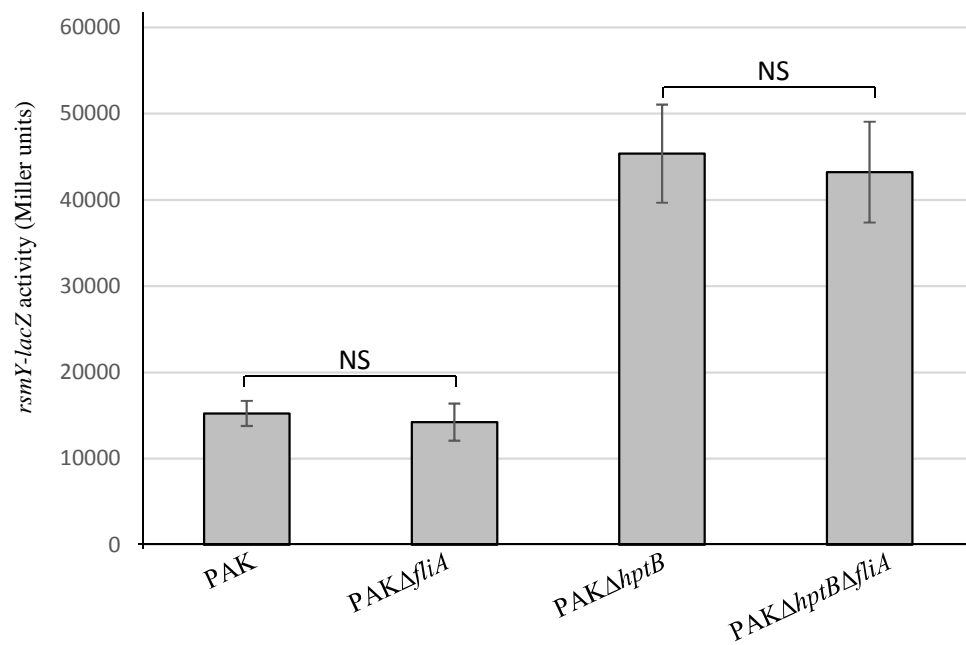

Figure S6

A.

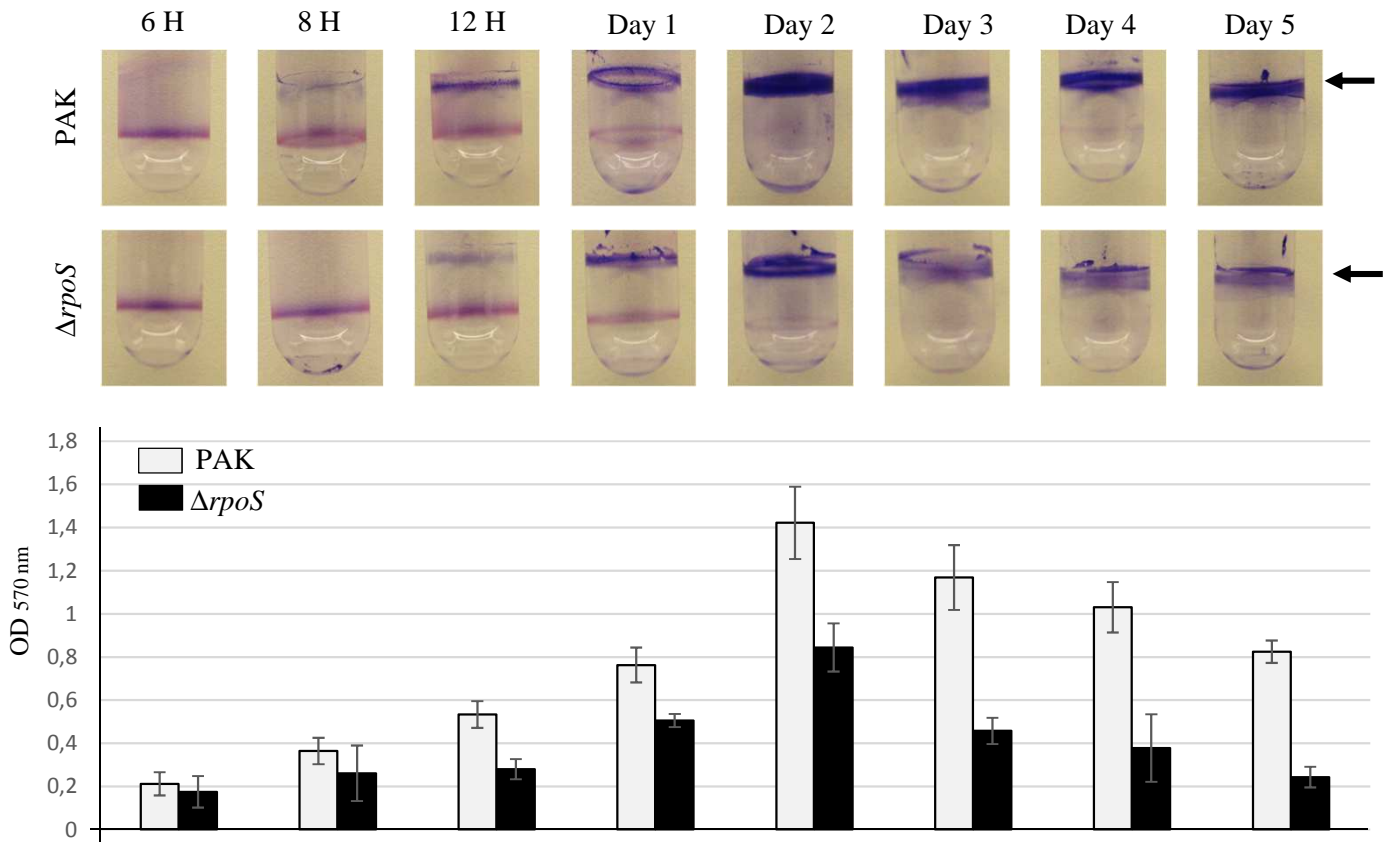

B.

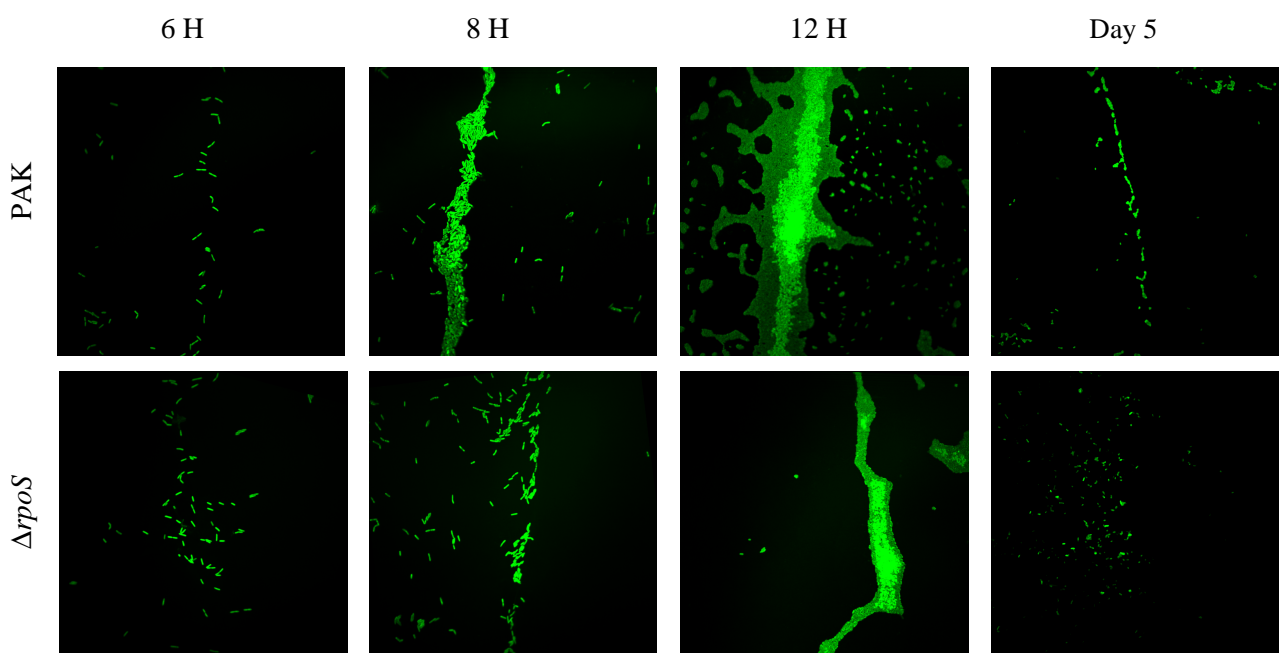

Supplement: 41598_2019_42653_MOESM1_ESM.pdf [file 41598_2019_42653_MOESM1_ESM.pdf]
